# Supplementary material
Source: MDPI journal article supplement (https://www.mdpi.com/1999-4907/10/12/1107)

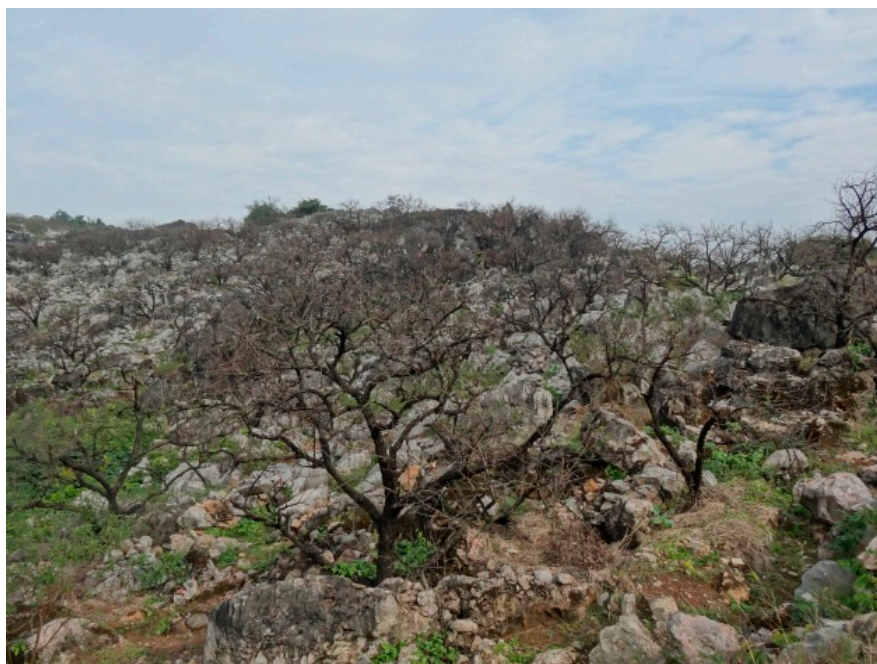

**Figure S1.** Rocky desertification in the study area.

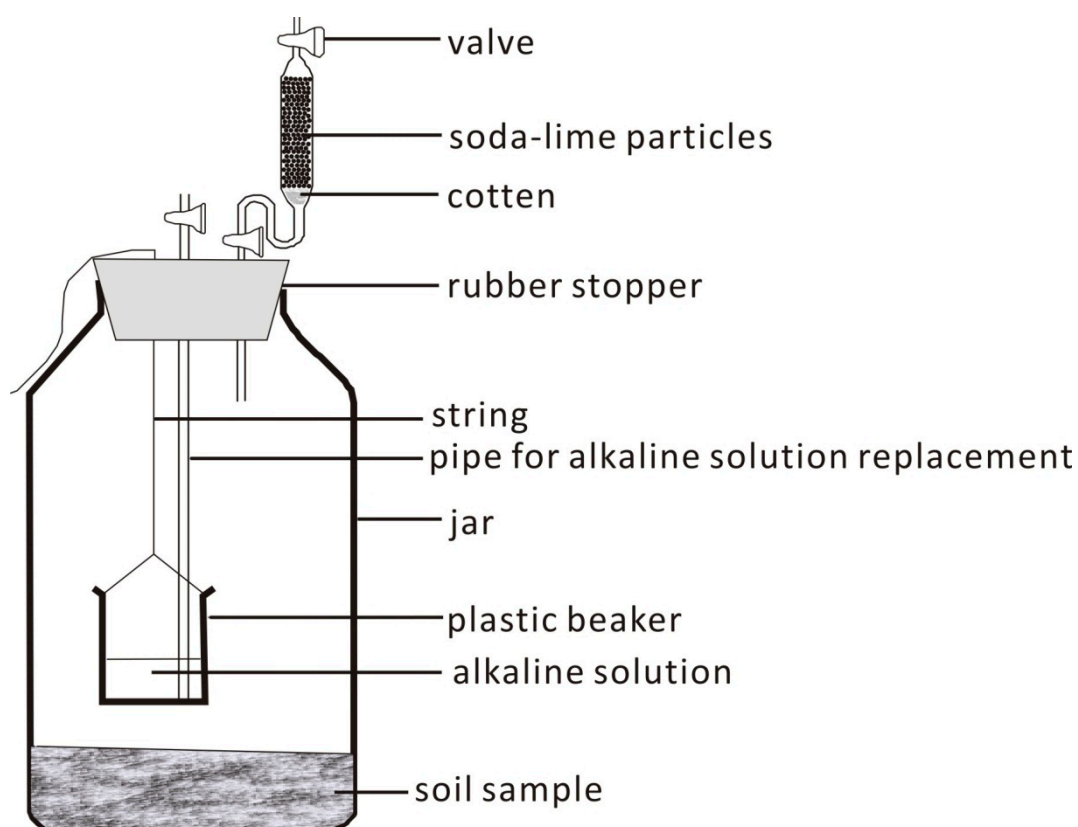

**Figure S2.** The sketch of incubation device.

Supplement: s1 [file s1]
